# Supplementary material for: Study of double core hole excitations in molecules by X-ray double-quantum-coherence signals: a multi-configuration simulation
Source: PubMed Central journal article supplement — Chem Sci. 2016 May 12;7(9):5922–33. doi: 10.1039/c6sc01571a (PMC6022231; doi:10.1039/c6sc01571a), 2016-05-12
Supplement: SC-007-C6SC01571A-s001.pdf [file SC-007-C6SC01571A-s001.pdf]

*Supporting Information*

## Study of double core hole excitations in molecules by X-ray double-quantum-coherence signals: a multi-configuration simulation

Weijie Hua,<sup>ab</sup> Kochise Bennett,<sup>a</sup> Yu Zhang,<sup>a</sup> Yi Luo,<sup>bc</sup> and Shaul Mukamel<sup>\*a</sup>

### This PDF file contains

|                     |   |
|---------------------|---|
| Table S1 .....      | 1 |
| Figures S1-S5 ..... | 2 |

---

<sup>a</sup> Department of Chemistry, University of California, Irvine, CA 92697-2025, United States. E-mail: smukamel@uci.edu

<sup>b</sup> Department of Theoretical Chemistry and Biology, School of Biotechnology, KTH Royal Institute of Technology, S-10691 Stockholm, Sweden.

<sup>c</sup> Hefei National Laboratory for Physical Sciences at the Microscale, University of Science and Technology of China, Hefei, Anhui 230026, China.

**Table S1** RASSCF energy levels (in eV) of p-aminophenol selected for XDQC signal simulations.  $e^N$  and  $e^O$  are N1s and O1s SCH excited states,  $f^{NN}$ ,  $f^{OO}$ ,  $f^{NO}$  are DCH excited states. Shifts had been applied according to the text.

| $e_i^N$ | Energy   | $f_i^{NN}$ | Energy    | $f_i^{NO}$ | Energy   |
|---------|----------|------------|-----------|------------|----------|
| 1       | 401.4822 | 1          | 870.8938  | 1          | 933.0650 |
| 2       | 401.6993 | 2          | 872.6560  | 2          | 933.3127 |
| 3       | 402.3080 | 3          | 872.7349  | 3          | 933.5179 |
| 4       | 402.7381 | 4          | 873.6410  | 4          | 933.5962 |
| 5       | 404.1175 | 5          | 873.6956  | 5          | 933.7148 |
|         |          | 6          | 874.2115  | 6          | 933.8504 |
|         |          | 7          | 875.1804  | 7          | 934.0713 |
| $e_i^O$ | Energy   | 8          | 875.9051  | 8          | 934.1381 |
| 1       | 533.8622 | 9          | 876.0974  | 9          | 934.3231 |
| 2       | 534.2132 | 10         | 876.1897  | 10         | 934.3720 |
| 3       | 534.8883 |            |           | 11         | 934.5522 |
| 4       | 536.5819 |            |           | 12         | 934.7414 |
| 5       | 537.6403 | $f_i^{OO}$ | Energy    | 13         | 934.8674 |
| 6       | 537.8379 | 1          | 1148.2804 | 14         | 935.0193 |
| 7       | 538.1405 | 2          | 1148.5340 | 15         | 935.3065 |
|         |          | 3          | 1148.8677 | 16         | 935.3953 |
|         |          | 4          | 1150.7172 | 17         | 935.4408 |
|         |          | 5          | 1152.1360 | 18         | 935.5753 |
|         |          | 6          | 1152.3517 | 19         | 935.9372 |
|         |          | 7          | 1152.9617 | 20         | 935.9951 |
|         |          | 8          | 1153.0162 | 21         | 936.0142 |
|         |          | 9          | 1153.4704 | 22         | 936.2642 |
|         |          | 10         | 1154.3092 | 23         | 936.6959 |
|         |          |            |           | 24         | 936.7117 |
|         |          |            |           | 25         | 936.8616 |
|         |          |            |           | 26         | 936.9273 |
|         |          |            |           | 27         | 936.9564 |
|         |          |            |           | 28         | 937.0654 |
|         |          |            |           | 29         | 937.4285 |
|         |          |            |           | 30         | 937.8068 |

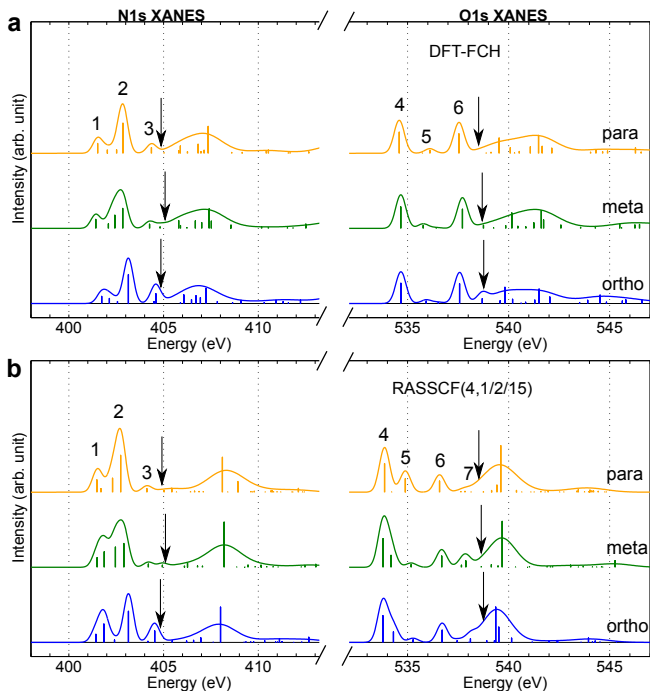

**Figure S1** N1s and O1s XANES spectra of p-, m-, and o-aminophenols calculated at the (a) DFT-FCH and (b) RASSCF(4, 1/2/15) levels using a different convolution scheme than the main text, which better resolve the spectra above the ionic potentials (IP). Gaussian line shape was used with  $hwhm = 0.3$  eV below the IP, linearly increasing  $hwhm$  in the next 1 eV, and  $hwhm = 1.0$  eV in the region beyond. Arrows mark the calculated IP by the DFT-FCH method. Major peaks below the IP are labeled.

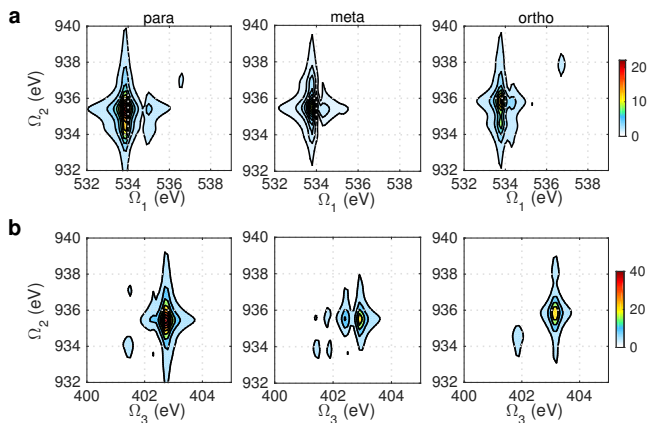

**Figure S2** ON-A XDQC signals (absolute values) of p-, m-, and o-aminophenols (left to right) (see Table 1 of the text for notations). (a)  $S_{III}(t_3 = 6.1 \text{ fs}, \Omega_2, \Omega_1)$ , (b)  $S_{III}(\Omega_3, \Omega_2, t_1 = 0 \text{ fs})$ .

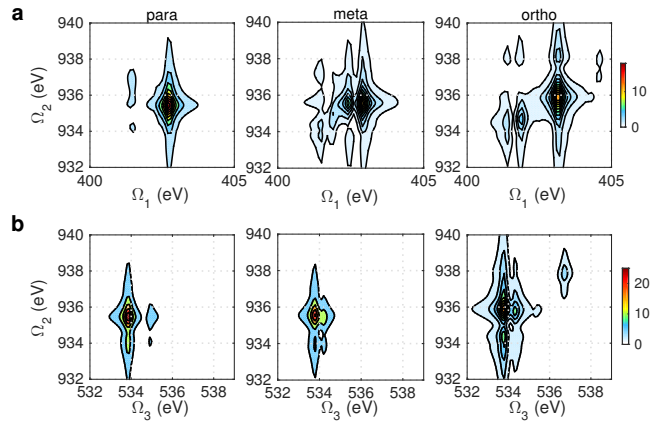

**Figure S3** NO-A XDQC signals (absolute values) of p-, m-, and o-aminophenols (left to right). (a)  $S_{III}(t_3 = 6.1 \text{ fs}, \Omega_2, \Omega_1)$ , (b)  $S_{III}(\Omega_3, \Omega_2, t_1 = 0 \text{ fs})$ .

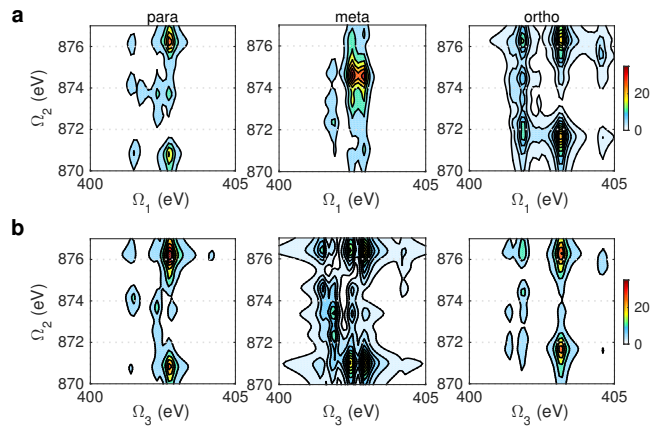

**Figure S4** NN-A XDQC signals (absolute values) of p-, m-, and o-aminophenols (left to right). (a)  $S_{III}(t_3 = 6.1 \text{ fs}, \Omega_2, \Omega_1)$ , (b)  $S_{III}(\Omega_3, \Omega_2, t_1 = 0 \text{ fs})$ .

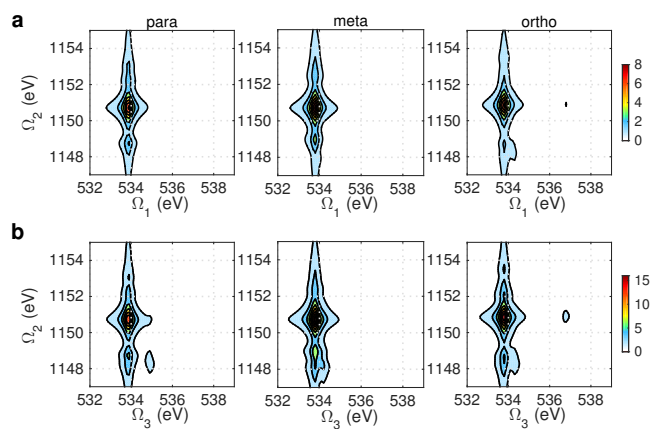

**Figure S5** OO-A XDQC signals (absolute values) of p-, m-, and o-aminophenols (left to right). (a)  $S_{III}(t_3 = 6.1 \text{ fs}, \Omega_2, \Omega_1)$ , (b)  $S_{III}(\Omega_3, \Omega_2, t_1 = 0 \text{ fs})$ .
